# Supplementary material for: Panaxynol, a bioactive component of American ginseng, targets macrophages and suppresses colitis in mice
Source: Oncotarget. 2020 Jun 2;11(22):2026–36. doi: 10.18632/oncotarget.27592 (PMC7275787; doi:10.18632/oncotarget.27592)
Supplement: Supplementary file 1 [file oncotarget-11-2026-s001.pdf]

## Panaxynol, a bioactive component of American ginseng, targets macrophages and suppresses colitis in mice

### SUPPLEMENTARY MATERIALS

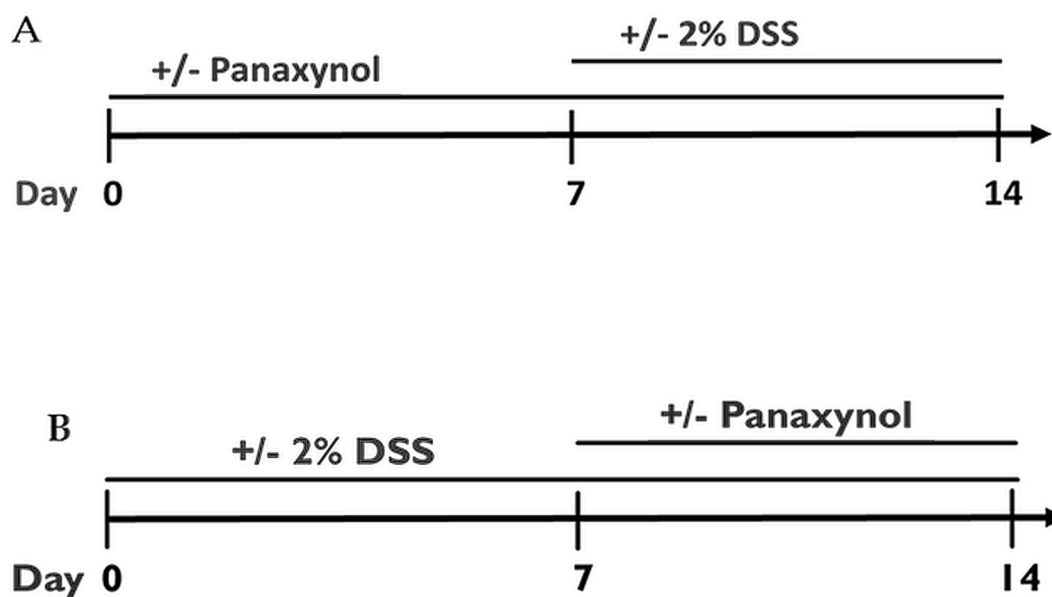

**Supplementary Figure 1: Schematics of *in vivo* experimental courses.** (A) Prevention model of colitis where the mice were treated with Panaxynol before induction of colitis using 2% DSS. (B) Treatment model where mice were treated with Panaxynol after the manifestation of the disease due to DSS treatment.

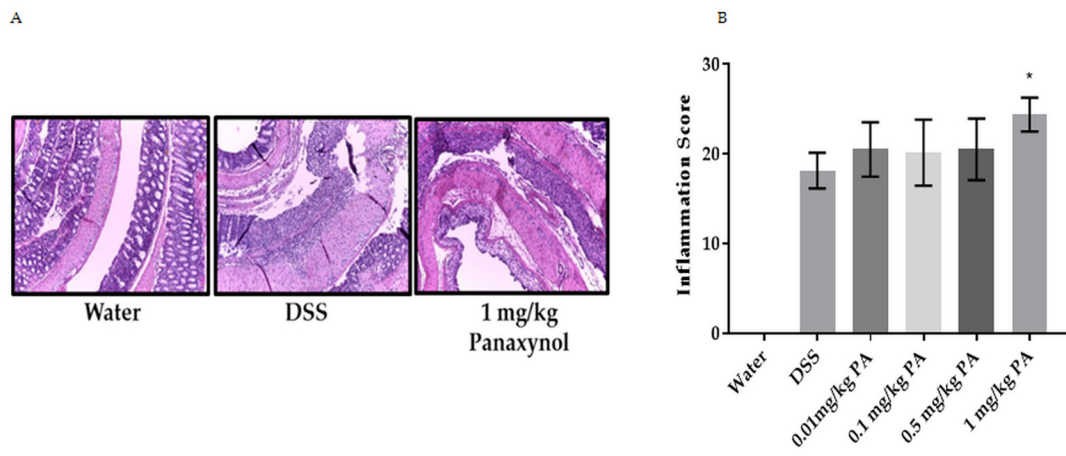

**Supplementary Figure 2: Panaxynol does not prevent colitis in mice.** (A) Representative images of H & E stained sections of colons (100×). (B) Inflammation scores obtained from H & E slides of the colon cross-sections.

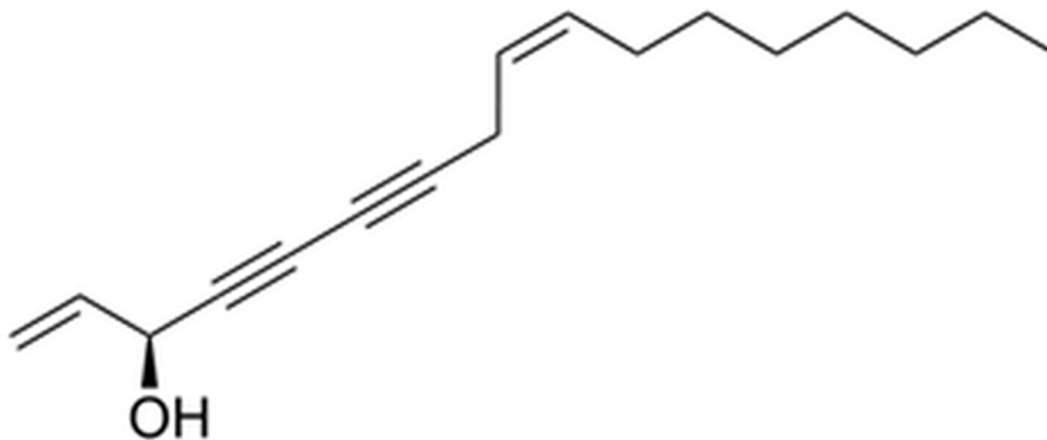

**Supplementary Figure 3: Structure of Panaxynol.**

**Supplementary Table 1: Treatments and conditions for each group**

| Group | DSS | Panaxynol  |
|-------|-----|------------|
| 1     | –   | -          |
| 2     | +   | -          |
| 3     | +   | 0.01 mg/kg |
| 4     | +   | 0.1 mg/kg  |
| 5     | +   | 0.5 mg/kg  |
| 6     | +   | 1.0 mg/kg  |

*n* = 8.
